# Supplementary material for: Comparison between Siliceous Concretions from the Ionian Basin and the Apulian Platform Margins (Pre-Apulian Zone), Western Greece: Implication of Differential Diagenesis on Nodules Evolution
Source: MDPI journal article supplement (doi:10.3390/min11080890), 2021-08-18
Supplement: s1 [file s1]

**Table S1.** Coordinate samples.

| Groups        | Sample Code | x          | y          |
|---------------|-------------|------------|------------|
| Group 1       | A11         | 38.096800° | 20.718100° |
|               | A12         | 38.097200° | 20.718400° |
| Group 2       | A2          | 38.102200° | 20.705300° |
|               | A3          | 38.102200° | 20.705300° |
|               | A4          | 38.102200° | 20.705300° |
|               | A5          | 38.102200° | 20.705300° |
|               | A6          | 38.102100° | 20.704400° |
|               | A7          | 38.102100° | 20.704400° |
|               | A8          | 38.102100° | 20.704400° |
|               | A9          | 38.102100° | 20.704400° |
| Group 3       | A1          | 38.112800° | 20.708500° |
|               | A10         | 38.108200° | 20.708800° |
| Group 4       | Sami        | 38.219800° | 20.634700° |
| Ithaca Island | Gidaki      | 38.385439° | 20.732453° |
|               | Cave Rizes  | 38.331137° | 20.728830° |
| Atokos Island | Atokos      | 38.482679° | 20.820097° |
